# Supplementary material for: Sexual communication in castniid moths: Males mark their territories and appear to bear all chemical burden
Source: PLOS journal article supplement (doi:10.1371/journal.pone.0171166), 2017-02-08
Supplement: S4 (10.1371/journal.pone.0171166.s004) [file journal.pone.0171166.s004]

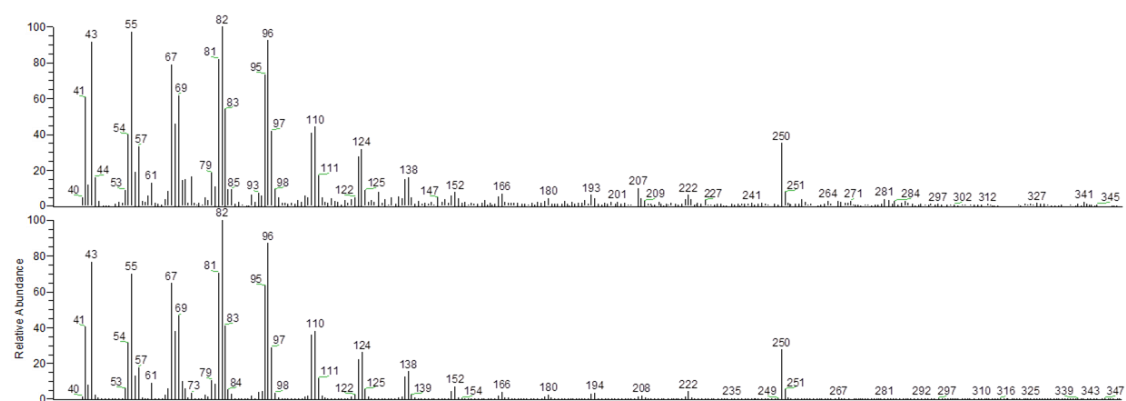

**S4 Fig. Mass spectrum of Z9-18:Ac from an extract of terminalia of a *P. archon* male in comparison to that of the synthetic material.**
