# Supplementary material for: Sexual communication in castniid moths: Males mark their territories and appear to bear all chemical burden
Source: PLOS journal article supplement (doi:10.1371/journal.pone.0171166), 2017-02-08
Supplement: S7 (10.1371/journal.pone.0171166.s007) [file journal.pone.0171166.s007]

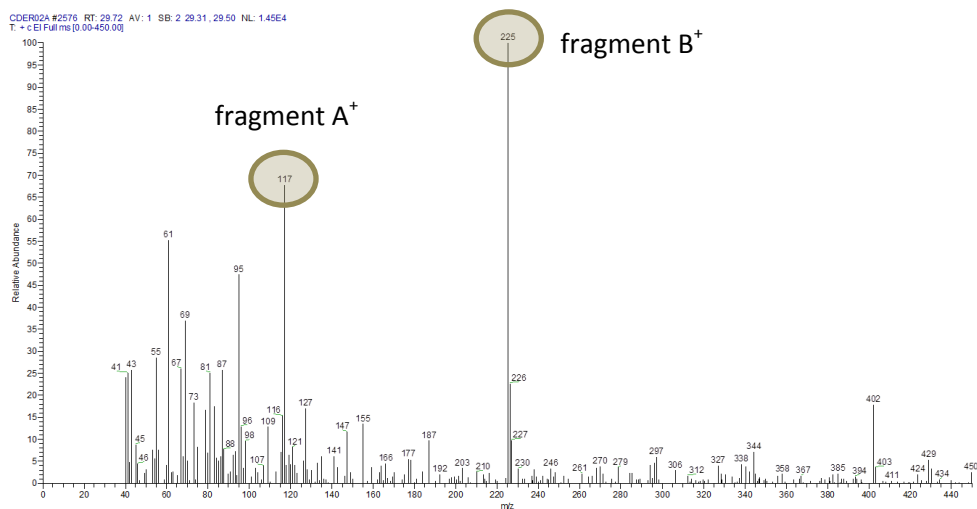

**S7 Fig. Mass spectrum of the DMDS adduct of E2,Z13-18:Ac from a terminalia extract of *P. archon* males after addition on the double bond at C-13. Diagnostic ions of m/z 117 and 225 correspond to  $[\text{CH}_3(\text{CH}_2)_3\text{CHSMe}]^+$  (fragment A<sup>+</sup>), and  $[\text{CH}_3\text{SCH}(\text{CH}_2)_9\text{CH}=\text{CHCH}_2\text{OAc}]^+$  (m/z 285) minus AcOH (fragment B<sup>+</sup>), respectively.**
